# Supplementary material
Source: MDPI journal article supplement (https://www.mdpi.com/2073-445X/11/12/2131)
Supplement: s1 [file s1]

Table S1. Overview of reported substitution factors for wood-based products

| Product category       | Study | Focus area                       | Life cycle stages                      | Product considered                                                                                              | Material substituted                               | Substitution factor (kg C/kg C) |
|------------------------|-------|----------------------------------|----------------------------------------|-----------------------------------------------------------------------------------------------------------------|----------------------------------------------------|---------------------------------|
| Cross-Laminated Timber | [43]  | Australia                        | Production, use and end-of-life stages | Nine-storey building featuring CLT panels as the main structural material                                       | Reinforced concrete                                | 1.95                            |
|                        | [44]  | Canada                           | Production and end-of-life stages      | Residential building (four-storey CLT versus)                                                                   | Concrete slab with light gauge steel studded walls | 0.46 (0.38-0.56)*               |
|                        | [45]  | Germany (North Rhine-Westphalia) | Production and end-of-life stages      | Softwood based glued timber products (glulam, CLT)                                                              | Concrete, steel, bricks                            | 1.30                            |
|                        | [46]  | United Kingdom                   | Production and end-of-life stages      | Multistorey buildings (≥8 storeys)                                                                              | Reinforced concrete                                | 0.58                            |
|                        |       |                                  |                                        |                                                                                                                 | Steel                                              | 1.02                            |
|                        | [47]  | Global                           | Production stage                       | Mid-rise urban construction (4–12 storeys), with CLT wall and floordeck. Floorspace: 9.2 m <sup>2</sup> /capita | Concrete and steel                                 | 0.16                            |
|                        |       |                                  |                                        | <i>Idem.</i> Floorspace: 30 m <sup>2</sup> /capita                                                              |                                                    | 0.28                            |
|                        |       |                                  |                                        | <i>Idem.</i> Floorspace: 79.1 m <sup>2</sup> /capita                                                            |                                                    | 0.48                            |

Table S1. (continued)

| Product category           | Study | Focus area | Life cycle stages | Product considered                                                                                         | Material substituted                              | Substitution factor (kg C/kg C) |
|----------------------------|-------|------------|-------------------|------------------------------------------------------------------------------------------------------------|---------------------------------------------------|---------------------------------|
| Man-Made Cellulosic Fibres | [89]  | Global     | Production stage  | Viscose (Asia): fibres produced from market pulp in Asia                                                   | Cotton fibres produced in United States and China | -1.09                           |
|                            |       |            |                   | Lyocell: fibres produced in Austria                                                                        |                                                   | 0.54                            |
|                            |       |            |                   | Lyocell (2012): fibres produced in Austria, using energy recovered from municipal solid waste incineration |                                                   | 1.18                            |
|                            |       |            |                   | Modal: fibres produced in Austria                                                                          |                                                   | 1.21                            |
|                            |       |            |                   | Viscose (Austria): fibres produced in integrated pulp and fibre mill in Austria                            |                                                   | 1.36                            |
|                            |       |            |                   | Viscose (Asia)                                                                                             | Polyester produced in West Europe                 | 0.18                            |
|                            |       |            |                   | Lyocell                                                                                                    |                                                   | 1.82                            |
|                            |       |            |                   | Lyocell (2012)                                                                                             |                                                   | 2.45                            |
|                            |       |            |                   | Modal                                                                                                      |                                                   | 2.51                            |
|                            |       |            |                   | Viscose (Austria)                                                                                          |                                                   | 2.63                            |
|                            |       |            |                   | Viscose (Asia)                                                                                             | Polyolefin ester produced in West Europe          | -0.61                           |
|                            |       |            |                   | Lyocell                                                                                                    |                                                   | 1.03                            |
|                            |       |            |                   | Lyocell (2012)                                                                                             |                                                   | 1.67                            |
|                            |       |            |                   | Modal                                                                                                      |                                                   | 1.71                            |
|                            |       |            |                   | Viscose (Austria)                                                                                          |                                                   | 1.85                            |

Table S1. (continued)

| Product category           | Study   | Focus area        | Life cycle stages                      | Product considered                                                                | Material substituted                                              | Substitution factor (kg C/kg C) |
|----------------------------|---------|-------------------|----------------------------------------|-----------------------------------------------------------------------------------|-------------------------------------------------------------------|---------------------------------|
| Man-Made Cellulosic Fibres | [73]    | Europe            | Production, and end-of-life stages     | Viscose                                                                           | Fibres from petroleum derivatives (PET, recycled PET, polyamides) | 3.10 (2.53-3.13)*               |
|                            | [74]    | Finland           | Production and end-of-life stages      | Dissolving pulp used for producing textile fibres (74% viscose, 26% other fibres) | Cotton                                                            | 4.00                            |
| Paper and paper products   | [75]    | Sweden            | Production, use and end-of-life stages | Interior design magazine                                                          | Tablet                                                            | -0.4 - +0.23                    |
|                            | [45,74] | Germany / Finland | Production and end-of-life stages      | Packaging (container boards, carton boards, and sack paper)                       | Plastic, glass, and metal packaging                               | 1.35                            |
|                            | [76]    | Europe            | Production, use and end-of-life stages | Single use cardboard packaging box                                                | Reusable plastic crates                                           | -1.86                           |
| Biochemicals               | [73]    | Europe            | Production and end-of-life stages      | Lignin-based polyol                                                               | Fossil-based phenol                                               | 1.35 (1.26-1.59)*               |

\*Reported range in substitution factors reflects different assumptions on energy mix and end-of-life practices

## References

43. Durlinger, B.; Crossin, E.; Wong, J. Life Cycle Assessment of a Cross Laminated Timber Building. Market Access Report PRA282-1112, Forest and Wood Products Australia. 2013.
44. Grann, B. A Comparative Life Cycle Assessment of Two Multistory Residential Buildings: Cross-Laminated Timber vs. Concrete Slab and Column with Light Gauge Steel Walls; FPInnovations: Vancouver, Canada, 2013.
45. Knauf, M.; Köhl, M.; Mues, V.; Olschofsky, K.; Frühwald, A. Modeling the CO<sub>2</sub>-Effects of Forest Management and Wood Usage on a Regional Basis. *Carbon Balance Manag.* 2015, 10, doi:10.1186/s13021-015-0024-7.
46. Hart, J.; D'Amico, B.; Pomponi, F. Whole-Life Embodied Carbon in Multistory Buildings: Steel, Concrete and Timber Structures. *J. Ind. Ecol.* 2021, 25, 403–418, doi:10.1111/jiec.13139.
47. Churkina, G.; Organschi, A.; Reyser, C.P.O.; Ruff, A.; Vinke, K.; Liu, Z.; Reck, B.K.; Graedel, T.E.; Schellnhuber, H.J. Buildings as a Global Carbon Sink. *Nat. Sustain.* 2020, 3, 269–276, doi:10.1038/s41893-019-0462-4.
73. Rüter, S.; Werner, F.; Forsell, N.; Prins, C.; Vial, E.; Levet, A.-L. ClimWood2030—Climate Benefits of Material Substitution by Forest Biomass and Harvested Wood Products: Perspective 2030. Thünen Report 42; Braunschweig, Germany, 2016. doi: 10.3220/REP1468328990000.
74. Hurmekoski, E.; Myllyviita, T.; Seppälä, J.; Heinonen, T.; Kilpeläinen, A.; Pukkala, T.; Mattila, T.; Hetemäki, L.; Asikainen, A.; Peltola, H. Impact of Structural Changes in Wood-Using Industries on Net Carbon Emissions in Finland. *J. Ind. Ecol.* 2020, 24, 899–912. <https://doi.org/10.1111/jiec.12981>.
75. Achachlouei, M.A.; Moberg, Å. Life Cycle Assessment of a Magazine, Part II: A Comparison of Print and Tablet Editions. *J. Ind. Ecol.* 2015, 19, 590–606. <https://doi.org/10.1111/jiec.12229>.
76. Albrecht, S.; Brandstetter, P.; Beck, T.; Fullana-i-Palmer, P.; Grönman, K.; Baitz, M.; Deimling, S.; Sandilands, J.; Fischer, M. An Extended Life Cycle Analysis of Packaging Systems for Fruit and Vegetable Transport in Europe. *Int. J. Life Cycle Assess.* 2013, 18, 1549–1567. <https://doi.org/10.1007/s11367-013-0590-4>.
89. Shen, L.; Worrell, E.; Patel, M.K. Environmental Impact Assessment of Man-Made Cellulose Fibres. *Resour. Conserv. Recycl.* 2010, 55, 260–274. <https://doi.org/10.1016/j.resconrec.2010.10.001>.
